CORRECTION

# Correction: A New Large Hyainailourine from the Bartonian of Europe and Its Bearings on the Evolution and Ecology of Massive Hyaenodonts (Mammalia)

The *PLOS ONE* Staff

## Notice of Republication

This article was republished on October 14, 2015, to correct the order of Figs 8–13. The publisher apologizes for the error. Please download this article again to view the correct version. The originally published, uncorrected article and the republished, corrected article are provided here for reference.

## Supporting Information

**S1 File. Originally published, uncorrected article.**  
(PDF)

**S2 File. Republished corrected article.**  
(PDF)

## Reference

1. Solé F, Amson E, Borths M, Vidalenc D, Morlo M, Bastl K (2015) A New Large Hyainailourine from the Bartonian of Europe and Its Bearings on the Evolution and Ecology of Massive Hyaenodonts (Mammalia). *PLoS ONE* 10(9): e0135698. doi:[10.1371/journal.pone.0135698](https://doi.org/10.1371/journal.pone.0135698) PMID: [26398622](https://pubmed.ncbi.nlm.nih.gov/26398622/)

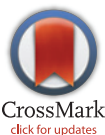

CrossMark  
click for updates

## OPEN ACCESS

**Citation:** The *PLOS ONE* Staff (2015) Correction: A New Large Hyainailourine from the Bartonian of Europe and Its Bearings on the Evolution and Ecology of Massive Hyaenodonts (Mammalia). *PLoS ONE* 10(10): e0141941. doi:[10.1371/journal.pone.0141941](https://doi.org/10.1371/journal.pone.0141941)

**Published:** October 30, 2015

**Copyright:** © 2015 The PLOS ONE Staff. This is an open access article distributed under the terms of the [Creative Commons Attribution License](https://creativecommons.org/licenses/by/4.0/), which permits unrestricted use, distribution, and reproduction in any medium, provided the original author and source are credited.
